# Supplementary material for: Dynamics of SARS-CoV-2 shedding in the respiratory tract depends on the severity of disease in COVID-19 patients
Source: PubMed Central journal article supplement — Eur Respir J. 2021 Jul 15;58(1):2002724. doi: 10.1183/13993003.02724-2020 (PMC7898160; doi:10.1183/13993003.02724-2020), 2021-07-15
Supplement: ERJ-02724-2020.Figure_S1.pdf [file ERJ-02724-2020.Figure_S1.pdf]

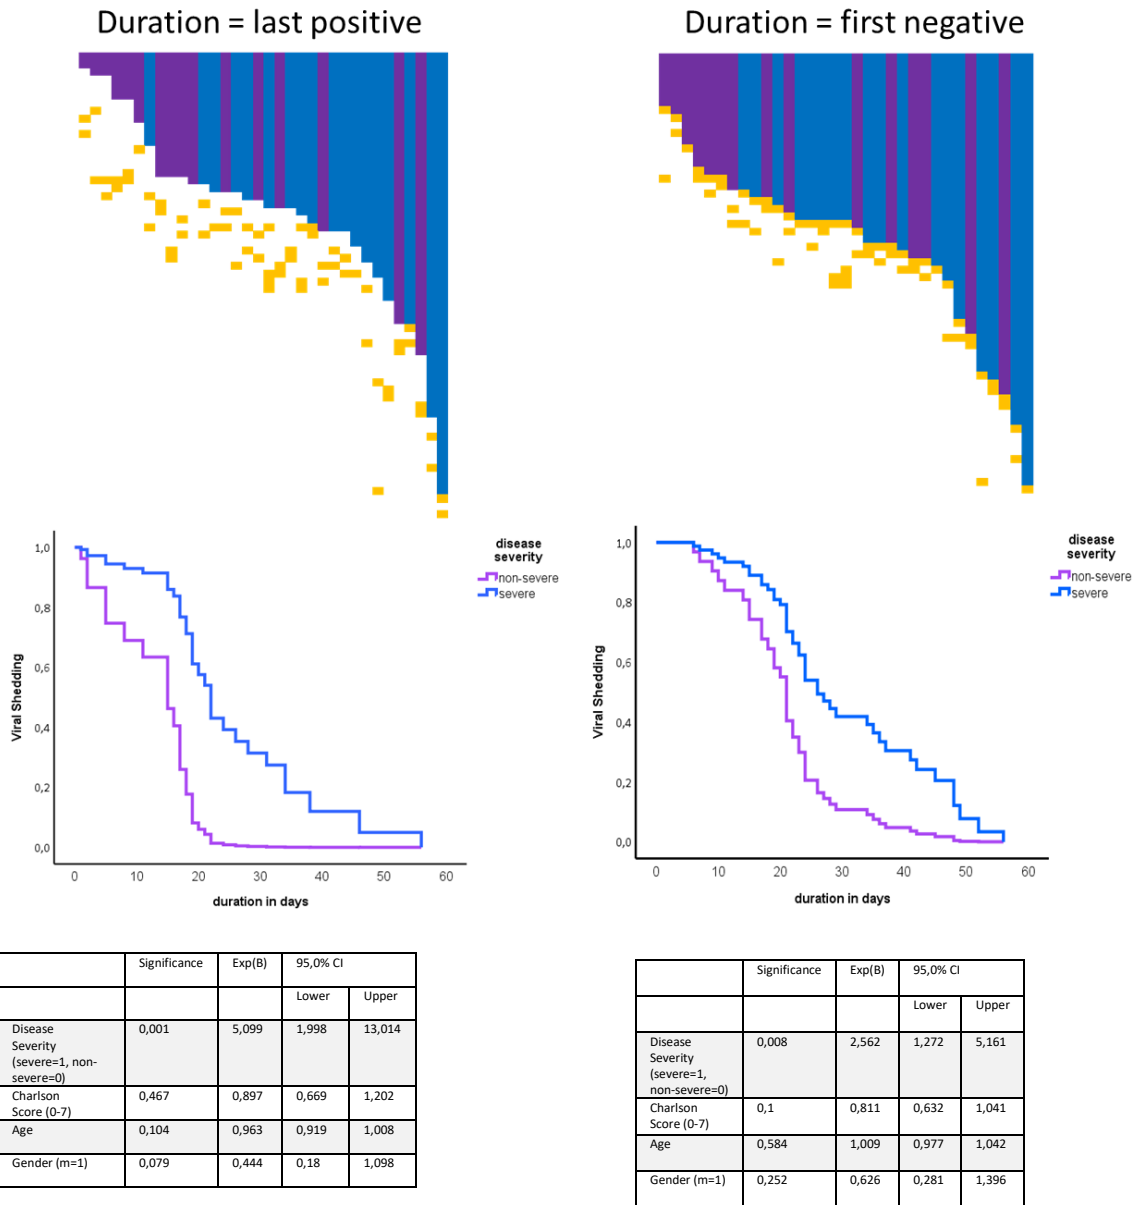

**Figure S1:** Cox-Regression analysis was performed with "duration of viral shedding" defined as the time from onset of symptoms to the last positive result (left figure) and until the first negative test result (right curve).
