# Supplementary material for: Dynamics of SARS-CoV-2 shedding in the respiratory tract depends on the severity of disease in COVID-19 patients
Source: PubMed Central journal article supplement — Eur Respir J. 2021 Jul 15;58(1):2002724. doi: 10.1183/13993003.02724-2020 (PMC7898160; doi:10.1183/13993003.02724-2020), 2021-07-15
Supplement: ERJ-02724-2020.Shareable.pdf [file ERJ-02724-2020.Shareable.pdf]

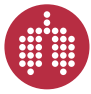

# Dynamics of SARS-CoV-2 shedding in the respiratory tract depends on the severity of disease in COVID-19 patients

SHAREABLE PDF

Dieter Munker <sup>1,12</sup>, Andreas Osterman<sup>2,3,12</sup>, Hans Stubbe<sup>4,5</sup>, Maximilian Muenchhoff<sup>2,3,4</sup>, Tobias Veit<sup>1</sup>, Tobias Weinberger<sup>6,7,8</sup>, Michaela Barnikel<sup>1</sup>, Jan-Niclas Mumm<sup>9</sup>, Katrin Milger <sup>1</sup>, Elham Khatamzas<sup>4,10</sup>, Sarah Klaus<sup>5</sup>, Clemens Scherer <sup>4,6,7,8</sup>, Johannes C. Hellmuth <sup>4,10</sup>, Clemens Giessen-Jung<sup>10</sup>, Michael Zoller<sup>11</sup>, Tobias Herold <sup>10</sup>, Stephanie Stecher<sup>5</sup>, Enrico N. de Toni<sup>5</sup>, Christian Schulz<sup>5</sup>, Nikolaus Kneidinger <sup>1</sup>, Oliver T. Keppler<sup>2</sup>, Jürgen Behr<sup>1</sup>, Julia Mayerle<sup>5</sup> and Stefan Munker<sup>5</sup>

<sup>1</sup>Dept of Medicine 5, University Hospital, Ludwig Maximilian University of Munich, Member of the German Center for Lung Research (DZL), Comprehensive Pneumology Center Munich, Munich, Germany. <sup>2</sup>Max von Pettenkofer Institute and Gene Center, Virology, National Reference Center for Retroviruses, Ludwig Maximilian University, Munich, Germany. <sup>3</sup>German Center for Infection Research, Partner Site Munich and Associated Partner Site Munich, Munich, Germany. <sup>4</sup>COVID-19 Registry of the LMU Munich (CORKUM), University Hospital, Ludwig Maximilian University of Munich, Munich, Germany. <sup>5</sup>Dept of Medicine 2, University Hospital, Ludwig Maximilian University of Munich, Munich, Germany. <sup>6</sup>Emergency Dept, University Hospital, Ludwig Maximilian University of Munich, Munich, Germany. <sup>7</sup>Dept of Medicine 1, Ludwig Maximilian University of Munich, Munich, Germany. <sup>8</sup>German Center for Cardiovascular Research (DZHK), Partner Site Munich Heart Alliance, Munich, Germany. <sup>9</sup>Dept of Urology, University Hospital, Ludwig Maximilian University of Munich, Munich, Germany. <sup>10</sup>Dept of Medicine 3, University Hospital, Ludwig Maximilian University of Munich, Munich, Germany. <sup>11</sup>Dept of Anaesthesiology, University Hospital, Ludwig Maximilian University of Munich, Munich, Germany. <sup>12</sup>These authors contributed equally to this work.

Corresponding author: Dieter Munker ([dieter.munker@med.uni-muenchen.de](mailto:dieter.munker@med.uni-muenchen.de))

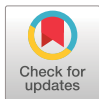

Shareable abstract (@ERSpublications)

**This work finds that elevated SARS-CoV-2 shedding in the second week of hospitalisation, a systemic inflammatory reaction peaking between the second and third week, and prolonged viral shedding are associated with a more severe COVID-19 disease course** <https://bit.ly/3p544zr>

**Cite this article as:** Munker D, Osterman A, Stubbe H, *et al.* Dynamics of SARS-CoV-2 shedding in the respiratory tract depends on the severity of disease in COVID-19 patients. *Eur Respir J* 2021; 58: 2002724 [DOI: 10.1183/13993003.02724-2020].

This single-page version can be shared freely online.

Copyright ©ERS 2021.

This version is distributed under the terms of the Creative Commons Attribution Non-Commercial Licence 4.0. For commercial reproduction rights and permissions contact [permissions@ersnet.org](mailto:permissions@ersnet.org)

This article has supplementary material available from [erj.ersjournals.com](http://erj.ersjournals.com)

Received: 10 July 2020  
Accepted: 13 Dec 2020

## Abstract

A fraction of COVID-19 patients progress to a severe disease manifestation with respiratory failure and the necessity of mechanical ventilation. Identifying patients at risk is critical for optimised care and early therapeutic interventions. We investigated the dynamics of severe acute respiratory syndrome coronavirus 2 (SARS-CoV-2) shedding relative to disease severity.

We analysed nasopharyngeal and tracheal shedding of SARS-CoV-2 in 92 patients with diagnosed COVID-19. Upon admission, standardised nasopharyngeal swab or sputum samples were collected. If patients were mechanically ventilated, endotracheal aspirate samples were additionally obtained. Viral shedding was quantified by real-time PCR detection of SARS-CoV-2 RNA.

45% (41 out of 92) of COVID-19 patients had a severe disease course with the need for mechanical ventilation (severe group). At week 1, the initial viral shedding determined from nasopharyngeal swabs showed no significant difference between nonsevere and severe cases. At week 2, a difference could be observed as the viral shedding remained elevated in severely ill patients. A time-course of C-reactive protein, interleukin-6 and procalcitonin revealed an even more protracted inflammatory response following the delayed drop of virus shedding load in severely ill patients. A significant proportion (47.8%) of patients showed evidence of prolonged viral shedding (>17 days), which was associated with severe disease courses (73.2%).

We report that viral shedding does not differ significantly between severe and nonsevere COVID-19 cases upon admission to the hospital. Elevated SARS-CoV-2 shedding in the second week of hospitalisation, a

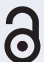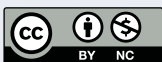

systemic inflammatory reaction peaking between the second and third week, and prolonged viral shedding are associated with a more severe disease course.
