# Supplementary material for: Dynamics of SARS-CoV-2 shedding in the respiratory tract depends on the severity of disease in COVID-19 patients
Source: PubMed Central journal article supplement — Eur Respir J. 2021 Jul 15;58(1):2002724. doi: 10.1183/13993003.02724-2020 (PMC7898160; doi:10.1183/13993003.02724-2020), 2021-07-15
Supplement: ERJ-02724-2020.Table_S1.pdf [file ERJ-02724-2020.Table_S1.pdf]

|                                                                |                 | <b>Non-Severe disease</b><br>No mechanical<br>ventilation | <b>Severe disease</b><br>Mechanical<br>Ventilation<br>necessary | <b>p-Value</b> |
|----------------------------------------------------------------|-----------------|-----------------------------------------------------------|-----------------------------------------------------------------|----------------|
|                                                                | n=92            | n=51 (55.4%)                                              | n=41 (44.6%)                                                    |                |
| <b>Number of tests per patient, <math>\pm</math> SD</b>        | 5.3 $\pm$ 4.2   | 3.3 $\pm$ 1.7                                             | 7.7 $\pm$ 4.9                                                   | <0.001         |
| <b>Testing Frequency (number of tests/day)</b>                 | 0.31 $\pm$ 0.14 | 0.29 $\pm$ 0.13                                           | 0.33 $\pm$ 0.15                                                 | 0.169          |
| <b>Twice negative testing available before discharge n (%)</b> | 34 (37.0%)      | 16 (31.3 %)                                               | 18 (43.9 %)                                                     | 0.154          |
| <b>Comorbidities n (%)</b>                                     |                 |                                                           |                                                                 |                |
| <b>Asthma bronchiale</b>                                       | 4 (4.3 %)       | 3 (5.5 %)                                                 | 1 (2.7 %)                                                       | 0.63           |
| <b>Smoking habit</b>                                           | 25 (27.2 %)     | 15 (27.3%)                                                | 10 (27.0%)                                                      | 0.81           |
| <b>Rheumatic disease</b>                                       | 3 (3.3 %)       | 3 (5.5 %)                                                 | 0 (0 %)                                                         | 0.25           |
| <b>History of solid cancer</b>                                 | 10 (10.9 %)     | 4 (7.8 %)                                                 | 6 (14.6 %)                                                      | 0.33           |
| <b>Solid organ transplantation</b>                             | 5 (5.4 %)       | 2 (3.9 %)                                                 | 3 (7.3%)                                                        | 0.65           |

**Table S1:** Extended patient characteristics: data are mean (SD) or n (%). p values were calculated by Mann-Whitney U test or  $\chi^2$  test, as appropriate. Severe disease was defined by the need of mechanical ventilation. Testing frequency was defined as the number of tests divided by the length of the hospital stay.
